# Supplementary material
Source: publisher site journal article supplement (https://static.cambridge.org/content/id/urn:cambridge.org:id:article:S2050124220000119/resource/name/S2050124220000119supp003.bib)
Supplement: Supplementary file 1 [file S2050124220000119supp003.bib]

@article{zhou2018novel,
  title={A novel community detection method in bipartite networks},
  author={Zhou, Cangqi and Feng, Liang and Zhao, Qianchuan},
  journal={Physica {A}: {S}tatistical {M}echanics and its {A}pplications},
  volume={492},
  pages={1679--1693},
  year={2018},
  publisher={Elsevier}
}

@article{2,
  title = {Module identification in bipartite and directed networks},
  author = {Guimer\`a, Roger and Sales-Pardo, Marta and Amaral, Lu\'{\i}s A. Nunes},
  journal = {Phys. {R}ev. {E}},
  volume = {76},
  issue = {3},
  pages = {036102},
  numpages = {8},
  year = {2007},
  month = {Sep},
  publisher = {American Physical Society},
}
%  url = {https://link.aps.org/doi/10.1103/PhysRevE.76.036102}

@article{3,
title = "The dual-projection approach for two-mode networks",
journal = "Social {N}etworks",
volume = "35",
number = "2",
pages = "204 - 210",
year = "2013",
note = "Special Issue on Advances in Two-mode Social Networks",
issn = "0378-8733",
author = "M.G. Everett and S.P. Borgatti",
publisher = "Elsevier"
}
%url = "http://www.sciencedirect.com/science/article/pii/S0378873312000354",

@article{4,
  title = {Modularity and community detection in bipartite networks},
  author = {Barber, Michael J.},
  journal = {Phys. {R}ev. {E}},
  volume = {76},
  issue = {6},
  pages = {066102},
  numpages = {9},
  year = {2007},
  month = {Dec},
  publisher = {American Physical Society},
}
%  url = {https://link.aps.org/doi/10.1103/PhysRevE.76.066102}

@article{6,
    author = {Melamed, David},
    journal = {{PLOS} {ONE}},
    publisher = {Public Library of Science},
    title = {Community Structures in Bipartite Networks: A Dual-Projection Approach},
    year = {2014},
    month = {05},
    volume = {9},
    pages = {1-5},
    number = {5},
}
%url = {https://doi.org/10.1371/journal.pone.0097823},
% doi = {10.1371/journal.pone.0097823}

@inproceedings{22,
	author = {Kate Starbird},
	title = {Examining the Alternative Media Ecosystem Through the Production of Alternative Narratives of Mass Shooting Events on {T}witter},
	booktitle = {Proc. {I}nternational {AAAI} {C}onference on {W}eb and {S}ocial {M}edia},
	year = {2017},
	keywords = {},
}
%	url = {https://aaai.org/ocs/index.php/ICWSM/ICWSM17/paper/view/15603}

@article{27,
title = "Mapping social dynamics on {F}acebook: The {B}rexit debate",
journal = "Social {N}etworks",
volume = "50",
pages = "6 - 16",
year = "2017",
issn = "0378-8733",
author = "Del Vicario, Michela and Zollo, Fabiana and Caldarelli, Guido and Scala, Antonio and Quattrociocchi, Walter",
publisher = "Elsevier"
}
%url = "http://www.sciencedirect.com/science/article/pii/S0378873316304166",

@article {29,
	author = {Schmidt, Ana Luc{\'\i}a and Zollo, Fabiana and Del Vicario, Michela and Bessi, Alessandro and Scala, Antonio and Caldarelli, Guido and Stanley, H. Eugene and Quattrociocchi, Walter},
	title = {Anatomy of news consumption on {F}acebook},
	volume = {114},
	number = {12},
	pages = {3035--3039},
	year = {2017},
	publisher = {National Academy of Sciences},
	issn = {0027-8424},
	journal = {Proceedings of the {N}ational {A}cademy of {S}ciences}
}
%	URL = {http://www.pnas.org/content/114/12/3035},

@inproceedings{30,
	author = {Matthew Williams and Iulia Cioroianu and Hywel Williams},
	title = {Different News for Different Views: Political News-Sharing Communities on Social Media Through the {UK} {G}eneral {E}lection in 2015},
	booktitle = {Proc. {W}orkshop on {N}ews and {P}ublic {O}pinion ({NECO}) at {I}nternational {AAAI} {C}onference on {W}eb and {S}ocial {M}edia},
	year = {2016},
	keywords = {},
}
%	url = {https://www.aaai.org/ocs/index.php/ICWSM/ICWSM16/paper/view/13232/12850}

@article{102,
title = "What is the difference of research collaboration network under different projections: Topological measurement and analysis",
journal = "Physica {A}: {S}tatistical {M}echanics and its {A}pplications",
volume = "392",
number = "15",
pages = "3248 - 3259",
year = "2013",
issn = "0378-4371",
author = "Yongjun Li and Chun You",
publisher = "Elsevier"
}
%url = "http://www.sciencedirect.com/science/article/pii/S0378437113002380",

@article{115,
  title = {Core of communities in bipartite networks},
  author = {Bongiorno, Christian and London, Andr\'as and Miccich\`e, Salvatore and Mantegna, Rosario N.},
  journal = {Phys. {R}ev. {E}},
  volume = {96},
  issue = {2},
  pages = {022321},
  numpages = {10},
  year = {2017},
  month = {Aug},
  publisher = {American Physical Society},
}
%  url = {https://link.aps.org/doi/10.1103/PhysRevE.96.022321}

@article{119,
  title = {Scientific collaboration networks. {II}. {S}hortest paths, weighted networks, and centrality},
  author = {Newman, M. E. J.},
  journal = {Phys. {R}ev. {E}},
  volume = {64},
  issue = {1},
  pages = {016132},
  numpages = {7},
  year = {2001},
  publisher = {American Physical Society},
}
%  url = {https://link.aps.org/doi/10.1103/PhysRevE.64.016132}
 
@article{131,
title = "Preferential attachment in randomly grown networks",
journal = "Physica {A}: {S}tatistical {M}echanics and its {A}pplications",
volume = "439",
pages = "85 - 92",
year = "2015",
issn = "0378-4371",
author = "Iain S. Weaver",
keywords = "Statistical mechanics, Networks",
publisher = "Elsevier"
}
%url = "http://www.sciencedirect.com/science/article/pii/S0378437115005725",

@article{132,
  title = {Are randomly grown graphs really random?},
  author = {Callaway, Duncan S. and Hopcroft, John E. and Kleinberg, Jon M. and Newman, M. E. J. and Strogatz, Steven H.},
  journal = {Phys. {R}ev. {E}},
  volume = {64},
  issue = {4},
  pages = {041902},
  numpages = {7},
  year = {2001},
  month = {Sep},
  publisher = {American Physical Society},
}
%  url = {https://link.aps.org/doi/10.1103/PhysRevE.64.041902}

@article{multilevel,
  author={Vincent D Blondel and Jean-Loup Guillaume and Renaud Lambiotte and Etienne Lefebvre},
  title={Fast unfolding of communities in large networks},
  journal={Journal of {S}tatistical {M}echanics: Theory and {E}xperiment},
  volume={2008},
  number={10},
  pages={P10008},
  year={2008}
}
%  url={http://stacks.iop.org/1742-5468/2008/i=10/a=P10008},

@article{ForceAtlas2,
    author = {Jacomy, Mathieu AND Venturini, Tommaso AND Heymann, Sebastien AND Bastian, Mathieu},
    journal = {{PLOS ONE}},
    publisher = {Public Library of Science},
    title = {Force{A}tlas2, a Continuous Graph Layout Algorithm for Handy Network Visualization Designed for the {G}ephi Software},
    year = {2014},
    month = {06},
    volume = {9},
    pages = {1-12},
    number = {6},
}
%    url = {https://doi.org/10.1371/journal.pone.0098679},

@article{Newman_power_laws,
author = { M.E.J.   Newman },
title = {Power laws, {P}areto distributions and {Z}ipf's law},
journal = {Contemporary {P}hysics},
volume = {46},
number = {5},
pages = {323-351},
year  = {2005},
publisher = {Taylor & Francis},
}
%URL = {  https://doi.org/10.1080/00107510500052444},

@article{modular,
author = {Marquitti, Flavia Maria Darcie and Guimarães, Paulo Roberto and Pires, Mathias Mistretta and Bittencourt, Luiz Fernando},
title = {{MODULAR}: software for the autonomous computation of modularity in large network sets},
journal = {Ecography},
volume = {37},
number = {3},
pages = {221-224},
year = {2014},
}
%url = {https://onlinelibrary.wiley.com/doi/abs/10.1111/j.1600-0587.2013.00506.x},

@article {Beckett2016,
	author = {Beckett, Stephen J.},
	title = {Improved community detection in weighted bipartite networks},
	volume = {3},
	number = {1},
	year = {2016},
	publisher = {The Royal Society},
	journal = {Royal {S}ociety {O}pen {S}cience}
}
%	URL = {http://rsos.royalsocietypublishing.org/content/3/1/140536},

@article{lariviere2009decline,
  title={The decline in the concentration of citations, 1900--2007},
  author={Larivi{\`e}re, Vincent and Gingras, Yves and Archambault, {\'E}ric},
  journal={Journal of the {A}merican {S}ociety for {I}nformation {S}cience and {T}echnology},
  volume={60},
  number={4},
  pages={858--862},
  year={2009},
  publisher={Wiley Online Library}
}

@InProceedings{project_detect,
author="Cann, Tristan J. B.
and Weaver, Iain S.
and Williams, Hywel T. P.",
title="Is it Correct to Project and Detect? {A}ssessing Performance of Community Detection on Unipartite Projections of Bipartite Networks",
booktitle="Complex {N}etworks and {T}heir {A}pplications VII",
year="2019",
publisher="Springer International Publishing",
pages="267--279",
isbn="978-3-030-05411-3"
}

@article{bus_transport,
title = "A study on some urban bus transport networks",
journal = "Physica {A}: {S}tatistical {M}echanics and its {A}pplications",
volume = "376",
pages = "747 - 754",
year = "2007",
issn = "0378-4371",
url = "http://www.sciencedirect.com/science/article/pii/S0378437106011459",
author = "Yong-Zhou Chen and Nan Li and Da-Ren He"
}

@inproceedings{text_threshold,
 author = {Srivastava, Ajitesh and Soto, Axel J. and Milios, Evangelos},
 title = {Text Clustering Using One-mode Projection of Document-word Bipartite Graphs},
 booktitle = {Proceedings of the 28th {A}nnual {ACM} {S}ymposium on {A}pplied {C}omputing},
 series = {SAC '13},
 year = {2013},
 isbn = {978-1-4503-1656-9},
 location = {Coimbra, Portugal},
 pages = {927--932},
 numpages = {6},
 url = {http://doi.acm.org/10.1145/2480362.2480539},
 doi = {10.1145/2480362.2480539},
 acmid = {2480539},
 keywords = {clustering, modularity, one-mode projection},
} 

@inproceedings{crime_unweighted,
 author = {Alzahrani, Taher and Horadam, K. J.},
 title = {Analysis of Two Crime-related Networks Derived from Bipartite Social Networks},
 booktitle = {Proceedings of the 2014 {IEEE/ACM} {I}nternational {C}onference on {A}dvances in {S}ocial {N}etworks {A}nalysis and {M}ining},
 series = {ASONAM '14},
 year = {2014},
 isbn = {978-1-4799-5876-4},
 location = {Beijing, China},
 pages = {890--897},
 numpages = {8},
 url = {http://dl.acm.org/citation.cfm?id=3191835.3192010},
 acmid = {3192010},
} 

@inproceedings{criminal-crime,
 author = {Isah, Haruna and Neagu, Daniel and Trundle, Paul},
 title = {Bipartite Network Model for Inferring Hidden Ties in Crime Data},
 booktitle = {Proceedings of the 2015 {IEEE/ACM} {I}nternational {C}onference on {A}dvances in {S}ocial {N}etworks {A}nalysis and {M}ining 2015},
 series = {ASONAM '15},
 year = {2015},
 isbn = {978-1-4503-3854-7},
 location = {Paris, France},
 pages = {994--1001},
 numpages = {8},
 url = {http://doi.acm.org/10.1145/2808797.2808842},
 acmid = {2808842},
} 

@article{coauthor_cocitation,
author = {Yan, Erjia and Ding, Ying},
title = {Scholarly network similarities: How bibliographic coupling networks, citation networks, cocitation networks, topical networks, coauthorship networks, and coword networks relate to each other},
journal = {Journal of the {A}merican {S}ociety for {I}nformation {S}cience and {T}echnology},
volume = {63},
number = {7},
pages = {1313-1326},
keywords = {network analysis, citation networks, bibliographic coupling, co-citation analysis, joint authorship},
url = {https://onlinelibrary.wiley.com/doi/abs/10.1002/asi.22680},
year = {2012}
}

@article {Newman_modularity,
	author = {Newman, M. E. J.},
	title = {Modularity and community structure in networks},
	volume = {103},
	number = {23},
	pages = {8577--8582},
	year = {2006},
	publisher = {National Academy of Sciences},
	issn = {0027-8424},
	URL = {https://www.pnas.org/content/103/23/8577},
	journal = {Proceedings of the {N}ational {A}cademy of {S}ciences}
}

@inproceedings{randw_recommender,
 author = {Lee, Sangkeun and Song, Sang-il and Kahng, Minsuk and Lee, Dongjoo and Lee, Sang-goo},
 title = {Random Walk Based Entity Ranking on Graph for Multidimensional Recommendation},
 booktitle = {Proceedings of the {F}ifth {ACM} {C}onference on {Recommender Systems}},
 year = {2011},
 isbn = {978-1-4503-0683-6},
 location = {Chicago, Illinois, USA},
 pages = {93--100},
 numpages = {8},
 url = {http://doi.acm.org/10.1145/2043932.2043952},
 doi = {10.1145/2043932.2043952},
 acmid = {2043952},
 publisher = {ACM}
} 

@Article{Sasahara2016,
author="Sasahara, Kazutoshi",
title="Visualizing Collective Attention Using Association Networks",
journal="New {G}eneration {C}omputing",
year="2016",
month="Oct",
day="01",
volume="34",
number="4",
pages="323--340",
issn="1882-7055",
doi="10.1007/s00354-016-0402-z",
url="https://doi.org/10.1007/s00354-016-0402-z"
}

@article {Grinberg374,
	author = {Grinberg, Nir and Joseph, Kenneth and Friedland, Lisa and Swire-Thompson, Briony and Lazer, David},
	title = {Fake news on {T}witter during the 2016 {U.S.} presidential election},
	volume = {363},
	number = {6425},
	pages = {374--378},
	year = {2019},
	doi = {10.1126/science.aau2706},
	publisher = {American Association for the Advancement of Science},
	issn = {0036-8075},
	URL = {https://science.sciencemag.org/content/363/6425/374},
	eprint = {https://science.sciencemag.org/content/363/6425/374.full.pdf},
	journal = {Science}
}

@article{Saracco_2017,
	doi = {10.1088/1367-2630/aa6b38},
	url = {https://doi.org/10.1088%2F1367-2630%2Faa6b38},
	year = 2017,
	month = {may},
	publisher = {{IOP} Publishing},
	volume = {19},
	number = {5},
	pages = {053022},
	author = {Fabio Saracco and Mika J Straka and Riccardo Di Clemente and Andrea Gabrielli and Guido Caldarelli and Tiziano Squartini},
	title = {Inferring monopartite projections of bipartite networks: an entropy-based approach},
	journal = {New {J}ournal of {P}hysics}
}

@article{JMLR:v17:15-627,
  author  = {Simone Romano and Nguyen Xuan Vinh and James Bailey and Karin Verspoor},
  title   = {Adjusting for Chance Clustering Comparison Measures},
  journal = {Journal of {M}achine {L}earning {R}esearch},
  year    = {2016},
  volume  = {17},
  number  = {134},
  pages   = {1-32},
  url     = {http://jmlr.org/papers/v17/15-627.html}
}

@article{PhysRevE.90.012805,
  title = {Efficiently inferring community structure in bipartite networks},
  author = {Larremore, Daniel B. and Clauset, Aaron and Jacobs, Abigail Z.},
  journal = {{P}hys. {R}ev. {E}},
  volume = {90},
  issue = {1},
  pages = {012805},
  numpages = {12},
  year = {2014},
  month = {Jul},
  publisher = {American Physical Society},
  doi = {10.1103/PhysRevE.90.012805},
  url = {https://link.aps.org/doi/10.1103/PhysRevE.90.012805}
}

@article{wyse_friel_latouche_2017,
  title={Inferring structure in bipartite networks using the latent blockmodel and exact {ICL}},
  volume={5},
  DOI={10.1017/nws.2016.25},
  number={1},
  journal={Network {S}cience},
  publisher={Cambridge University Press},
  author={Wyse, Jason and Friel, Nial and Latouche, Pierre},
  year={2017},
  pages={45–69}
}

@article{review_spam,
    author = {Wang, Zhuo and Hou, Tingting and Song, Dawei and Li, Zhun and Kong, Tianqi},
    title = "{Detecting Review Spammer Groups via Bipartite Graph Projection}",
    journal = {The {C}omputer {J}ournal},
    volume = {59},
    number = {6},
    pages = {861-874},
    year = {2016},
    month = {06},
    abstract = "{Online product reviews play an important role in E-commerce websites because most customers read and rely on them when making purchases. For the sake of profit or reputation, review spammers deliberately write fake reviews to promote or demote target products, some even fraudulently work in groups to try and control the sentiment about a product. To detect such spammer groups, previous work exploits frequent itemset mining (FIM) to generate candidate spammer groups, which can only find tightly coupled groups, i.e. each reviewer in the group reviews every target product. In this paper, we present the loose spammer group detection problem, i.e. each group member is not required to review every target product. We solve this problem using bipartite graph projection. We propose a set of group spam indicators to measure the spamicity of a loose spammer group, and design a novel algorithm to identify highly suspicious loose spammer groups in a divide and conquer manner. Experimental results show that our method not only can find loose spammer groups with high precision and recall, but also can generate more meaningful candidate spammer groups than FIM, thus it can also be used as an alternative preprocessing tool for existing FIM-based approaches.}",
    issn = {0010-4620},
    doi = {10.1093/comjnl/bxv068},
    url = {https://doi.org/10.1093/comjnl/bxv068},
    eprint = {http://oup.prod.sis.lan/comjnl/article-pdf/59/6/861/10325832/bxv068.pdf},
}

@ARTICLE{rudy,
       author = {{Arthur}, Rudy},
        title = "{Modularity and Projection of Bipartite Networks}",
      journal = {ar{X}iv e-prints},
     keywords = {Computer Science - Social and Information Networks, Physics - Physics and Society},
         year = "2019",
        month = "Aug",
          eid = {arXiv:1908.02520},
        pages = {arXiv:1908.02520},
archivePrefix = {arXiv},
       eprint = {1908.02520},
 primaryClass = {cs.SI},
       adsurl = {https://ui.adsabs.harvard.edu/abs/2019arXiv190802520A},
      adsnote = {Provided by the SAO/NASA Astrophysics Data System}
}
